# Supplementary material
Source: HighWire-hosted journal article supplement (https://www.bmj.com/content/suppl/2004/03/23/328.7441.673)
Supplement: schs6.pdf [file schs6.pdf]

**Review Quality Instrument (Version 3.2)\***  
**[Posted as supplied by the author]**

1. Did the reviewer discuss the importance of the research question?

|            |   |   |                       |   |
|------------|---|---|-----------------------|---|
| 1          | 2 | 3 | 4                     | 5 |
| Not at all |   |   | Discussed extensively |   |

2. Did the reviewer discuss the originality of the paper?

|            |   |   |                                       |   |
|------------|---|---|---------------------------------------|---|
| 1          | 2 | 3 | 4                                     | 5 |
| Not at all |   |   | Discussed extensively with references |   |

3. Did the reviewer clearly identify the strengths and weaknesses of the method (study design, data collection and data analysis)?

|            |   |   |               |   |
|------------|---|---|---------------|---|
| 1          | 2 | 3 | 4             | 5 |
| Not at all |   |   | Comprehensive |   |

4. Did the reviewer make specific useful comments on the writing, organisation, tables and figures of the manuscript?

|            |   |   |           |   |
|------------|---|---|-----------|---|
| 1          | 2 | 3 | 4         | 5 |
| Not at all |   |   | Extensive |   |

5. Were the reviewer's comments constructive?

|            |   |   |                   |   |
|------------|---|---|-------------------|---|
| 1          | 2 | 3 | 4                 | 5 |
| Not at all |   |   | Very constructive |   |

6. Did the reviewer supply appropriate evidence using examples from the paper to substantiate their comments?

|                           |   |                             |   |                            |
|---------------------------|---|-----------------------------|---|----------------------------|
| 1                         | 2 | 3                           | 4 | 5                          |
| No comments substantiated |   | Some comments substantiated |   | All comments substantiated |

7. Did the reviewer comment on the author's interpretation of the results?

|            |   |   |                       |   |
|------------|---|---|-----------------------|---|
| 1          | 2 | 3 | 4                     | 5 |
| Not at all |   |   | Discussed extensively |   |

8. How would you rate the quality of this review overall?

|      |   |   |           |   |
|------|---|---|-----------|---|
| 1    | 2 | 3 | 4         | 5 |
| Poor |   |   | Excellent |   |

\* van Rooyen S, Black N, Godlee F. Development of the Review Quality Instrument (RQI) for assessing peer reviews of manuscripts. J Clin Epidemiol 1999;52:625-9
